# Supplementary material for: Anti-Insulin Antibodies and Adverse Events with Biosimilar Insulin Lispro Compared with Humalog Insulin Lispro in People with Diabetes
Source: PubMed Central journal article supplement (PMC5771536; doi:10.1089/dia.2017.0373), 2018-02-01
Supplement: Supp_Table1.pdf [file Supp_Table1.pdf]

## Supplementary Data

SUPPLEMENTARY TABLE S1. SUMMARY OF ANTI-INSULIN ANTIBODY RESPONSE IN PARTICIPANTS USING INSULIN LISPRO BEFORE SORELLA 1 (12 MONTHS) AND SORELLA 2 (6 MONTHS) – AIA POPULATIONS

| <i>Participants</i>                                                               | <i>SORELLA 1</i>          |                          | <i>SORELLA 2</i>          |                          |
|-----------------------------------------------------------------------------------|---------------------------|--------------------------|---------------------------|--------------------------|
|                                                                                   | <i>SAR-Lis</i><br>(N=155) | <i>Ly-Lis</i><br>(N=158) | <i>SAR-Lis</i><br>(N=130) | <i>Ly-Lis</i><br>(N=126) |
| AIA positive at baseline, <i>n</i> (%)                                            | 80/155 (51.6)             | 81/158 (51.3)            | 31/130 (23.8)             | 27/126 (21.4)            |
| Median titer (1/dil)                                                              | 8.00                      | 4.00                     | 4.00                      | 4.00                     |
| Q1:Q3                                                                             | 2.00:16.00                | 2.00:12.00               | 2.00:8.00                 | 2.00:8.00                |
| Treatment-boosted AIA, <i>n</i> (%)                                               | 12/80 (15.0)              | 19/81 (23.5)             | 6/31 (19.4)               | 4/27 (14.8)              |
| Median peak titer <sup>a</sup> (1/dil)                                            | 16.00                     | 16.00                    | 8.00                      | 24.00                    |
| Q1:Q3                                                                             | 12.00:96.00               | 8.00:32.00               | 8.00:32.00                | 12.00:32.00              |
| AIA negative or missing at baseline, <i>n</i> (%)                                 | 75/155 (48.4)             | 77/158 (48.7)            | 99/130 (76.2)             | 99/126 (78.6)            |
| Treatment-induced AIA, <i>n</i> (%)                                               | 22/75 (29.3)              | 17/77 (22.1)             | 15/99 (15.2)              | 15/99 (15.2)             |
| Median peak titer <sup>a</sup> (1/dil)                                            | 1.00                      | 2.00                     | 4.00                      | 2.00                     |
| Q1:Q3                                                                             | 1.00:4.00                 | 1.00:4.00                | 1.00:32.00                | 1.00:4.00                |
| Participants with ≥1 positive AIA sample (prevalence) <sup>b</sup> , <i>n</i> (%) | 102/155 (65.8)            | 98/158 (62.0)            | 46/130 (35.4)             | 42/126 (33.3)            |
| Patients with treatment-emergent AIA (incidence) <sup>c</sup> , <i>n</i> (%)      | 34/155 (21.9)             | 36/158 (22.8)            | 21/130 (16.2)             | 19/126 (15.1)            |

<sup>a</sup>Maximal titer measured during the on-treatment period.

<sup>b</sup>Prevalence: participants AIA positive at baseline or with treatment-induced AIA.

<sup>c</sup>Incidence: participants with treatment-boosted or treatment-induced AIAs (i.e., participants with treatment-emergent AIA). AIA, anti-insulin antibodies; Ly-Lis, insulin lispro; SAR-Lis, SAR342434.
